# Supplementary material for: Bioelastomers: current state of development
Source: Royal Society of Chemistry journal article supplement (doi:10.1039/d1ta09404a), 2022-01-01
Supplement: d1ta09404a1.pdf [file d1ta09404a1.pdf]

## Supporting Information

### Bioelastomers: current state of development

Ilse Magaña<sup>a</sup>, Ricardo López<sup>a</sup>, Francisco Javier Enríquez-Medrano<sup>a</sup>, Sugam Kumar<sup>b</sup>, Andrea Aguilar-Sanchez<sup>c</sup>,  
Rishab Handa<sup>d</sup>, Ramón Díaz de León<sup>a\*</sup> and Luis Valencia<sup>e\*</sup>

<sup>a</sup> Research Center for Applied Chemistry, Blvd Enrique Reyna 140, San José de los Cerritos, 25294, Saltillo, Coahuila, México. Email: ramon.diazdeleon@ciqa.edu.mx

<sup>b</sup> Solid-State Physics Division, Bhabha Atomic Research Centre, Mumbai, 400 085, India.

<sup>c</sup> Division of Materials and Environmental Chemistry, Stockholm University, Frescativägen 8, 10691, Stockholm, Sweden.

<sup>d</sup> Experimental Physics, Saarland University, 66123, Saarbrücken, Germany.

<sup>e</sup> Biofiber Tech Sweden AB, Norrsken House, Birgen Jarksgatan 57 C, SE11356, Stockholm, Sweden.  
Email: luisalex\_val@hotmail.com

**Table S1.** Main bioelastomers based on polyterpenes, polyurethanes and polyesters described in the manuscript and their main characteristics/highlights.

| Type         | Bioelastomer |                     | Synthesis                                                       | Characteristics                                                                                                                                     | Highlights                                                                                                                              | Ref                    |
|--------------|--------------|---------------------|-----------------------------------------------------------------|-----------------------------------------------------------------------------------------------------------------------------------------------------|-----------------------------------------------------------------------------------------------------------------------------------------|------------------------|
| Polyterpenes | Polyocimene  | Polyocimene         | Redox emulsion polymerization                                   | Yields from 15-20%, with molecular weights nearly to 1.5 kDa                                                                                        | Difficult propagation of growing species                                                                                                | 35                     |
|              |              |                     | Coordination polymerization                                     | Use of titanium complexes give high 1,4- <i>trans</i> microstructure at higher temperatures.                                                        | Catalytic systems with a temperature-dependent stereoselectivity.                                                                       | 61                     |
|              |              |                     | Cationic polymerization                                         | Triflate esters as initiator.                                                                                                                       | Produce oligoocimenes at high conversion                                                                                                | 64                     |
|              |              | Ocimene and styrene | Coordination copolymerization                                   | Catalyst based on titanium complexes promote the copolymerizations.                                                                                 | Range of compositions of styrene from 0.23-0.87.                                                                                        | 61                     |
|              |              | Polyocimene         | Ammonium persulfate and redox-initiated emulsion polymerization | Monomer conversions ranging from 15 to 98% and molecular weights greater than 100 kDa. $T_g$ 's from -70 to 58 °C                                   | The redox emulsion polymerization achieves a maximum conversion of 65% but the polymer obtained contains a configuration preferably 1,4 | 20, 35                 |
|              | Myrcene      | Polymyrcene         | RAFT polymerization                                             | Monomer conversions from 24 to 50% and molecular weights from 2.4 to 9 kDa. $T_g$ 's close to -60 °C                                                | The resulting polymer has 1,4-isomer content greater than 90%                                                                           | 49, 50                 |
|              |              |                     | Coordination polymerization                                     | Titanium complexes form polymers with high 1,4- <i>trans</i> isomer content. The use of Lutonium alkyl complexes promote high 3,4-regioselectivity. | Cis-1,4 content higher than 92% can reach with neodymium catalyst.                                                                      | 54, 55, 57, 59, 60, 61 |
|              |              |                     | Cationic polymerization                                         | Oligomyrcenes obtained with triflate esters as initiator. Use of Lewis acid surfactant combined catalyst (LASC) produce                             | LASC provides a polymer with predominantly 1,4-units.                                                                                   | 64, 65                 |

|                                                                       |                               |                                                                                                                      |                                                                                                                                                 |            |
|-----------------------------------------------------------------------|-------------------------------|----------------------------------------------------------------------------------------------------------------------|-------------------------------------------------------------------------------------------------------------------------------------------------|------------|
|                                                                       |                               | polymyrcene with $M_n$ up to 150 <i>kDa</i> .                                                                        |                                                                                                                                                 |            |
|                                                                       | Anionic polymerization        | Trialkyl aluminum derivatives and <i>n</i> -butyllithium have been used as initiating systems.                       | Polymers with dispersities from 1.7-2 using trialkyl aluminum and less than 1.2 through butyllithium.                                           | 66, 67     |
| Poly(myrcene- <i>co</i> -styrene)                                     | Coordination copolymerization | Range of compositions from 0.14-0.9 of styrene with titanium catalyst.                                               | Catalyst system based on lanthanum produce a polymyrcene of the copolymer with 1,4- <i>trans</i> microstructure >98%.                           | 56, 61, 62 |
|                                                                       | Cationic copolymerization     | Random copolymers with $M_n$ from 60-120 <i>kDa</i> .                                                                | Use of LASC and able to recover from the reaction mixture.                                                                                      | 65         |
|                                                                       | NMP copolymerization          | Poly(myrcene- <i>b</i> -styrene) exhibit $T_g$ s about -70 and 60°C, brittle behavior, and better thermal stability. | Changing the molar feed compositions of the monomers is possible to obtain poly(myrcene- <i>stat</i> -styrene).                                 | 46         |
| Polystyrene- <i>b</i> -poly( $\beta$ -myrcene)- <i>b</i> -polystyrene | RAFT copolymerization         | Slightly broad dispersity in the triblock copolymer and PS content from 9.8-51.89 wt%.                               | Potential alternative biobased to TPEs as SBS and SIS.                                                                                          | 51         |
| Polymyrcene- <i>co</i> -polyisoprene                                  | Coordinative copolymerization | Catalyst system based on lanthanum produce maintain the 1,4- <i>trans</i> stereoregularity of the polymerization.    | Use of Lutetium catalyst results resulted in random and block copolymerization of myrcene and isoprene.                                         | 56, 58     |
| Poly(myrcene- <i>co</i> -isoprene- <i>co</i> -styrene)                | Coordinative copolymerization | Monomodal distributions and dispersities around 1.5-1.6 with lanthanum catalyst.                                     | The terpolymer presents high <i>trans</i> -1,4-polymyrcene content.                                                                             | 56         |
| Poly(myrcene- <i>co</i> -ethylene)                                    | Coordinative copolymerization | Use of half-sandwich scandium complexes.                                                                             | Depend on the ligands is possible to produce diblock myrcene-ethylene, multiblock myrcene-ethylene and alternating myrcene-ethylene copolymers. | 63         |
| Poly(styrene- <i>co</i> -ethylene- <i>co</i> -myrcene)                | Coordinative copolymerization | Monomodal molecular weight, narrow distribution (1.3-1.6) of the terpolymers with a lanthanidocene catalyst.         | Ethylene facilitates the insertion of styrene or $\beta$ -myrcene monomer.                                                                      | 62         |

|                                          |                                                                                                               |                                                    |                                                                                                                                    |                                                                                                                                 |                                                                                             |    |
|------------------------------------------|---------------------------------------------------------------------------------------------------------------|----------------------------------------------------|------------------------------------------------------------------------------------------------------------------------------------|---------------------------------------------------------------------------------------------------------------------------------|---------------------------------------------------------------------------------------------|----|
|                                          |                                                                                                               | Poly(myrcene-co-ethylene-co-propylene)             | Coordinative copolymerization                                                                                                      | High activity, unimodal and narrow molecular weight distribution with half-sandwich scandium complexes.                         | New generation of myrcene-based ethylene-propylene-diene rubbers (EPDM).                    | 63 |
|                                          |                                                                                                               | Myrcene and glycidyl methacrylate (GMA)            | NMP copolymerization                                                                                                               | The copolymers obtained have low dispersity and the molar fraction of GMA incorporated range from 0.10 to 0.90.                 | Copolymerization resulted in a statistical copolymer.                                       | 47 |
|                                          |                                                                                                               | Poly(myrcene-co-isobornyl methacrylate)            | NMP copolymerization                                                                                                               | Possible gradient myrcene/iBOMA copolymer with compositions of molar fraction from 0.10-0.90                                    | Thermoplastic elastomers from partially bio-based raw material to replace conventional TPEs | 48 |
|                                          |                                                                                                               | Poly(myrcene)- <i>b</i> -poly(methyl methacrylate) | Coordinative copolymerization                                                                                                      | Neodymium based catalyst                                                                                                        | Versatility to copolymerize myrcene with a polar vinyl monomer.                             | 60 |
|                                          | Polyfarnesene                                                                                                 | Polyfarnesene                                      | Redox emulsion polymerization                                                                                                      | Yields from 20-24% and molecular weights around to 3.2 kDa                                                                      | Side chain length impacts in the polymerization reaction                                    | 35 |
| Coordination polymerization              |                                                                                                               |                                                    | Iron complexes as catalyst.                                                                                                        | According to the ligand can be obtained trans-1,4 or cis-1,4 polyterpenes.                                                      | 55                                                                                          |    |
| Poly(farnesene-co-glycidyl methacrylate) |                                                                                                               | NMP copolymerization                               | Depend on the initiator used in the synthesis can be obtained poly(farnesene- <i>stat</i> -GMA) and poly(farnesene- <i>b</i> -GMA) | Functional groups into methacrylate can be used to compatibilized the polymer matrix with fillers or immiscible polymer blends. | 49                                                                                          |    |
| Poly(styrene-co-farnesene)               |                                                                                                               | Coordinative copolymerization                      | Lanthanidocene catalyst allow to produce an incorporation of 2.5 to 9.8 mol% of $\beta$ -farnesene in the copolymer.               | Essentially the microstructure consists of 1,4 and 3,4-polyterpene units.                                                       | 62                                                                                          |    |
| Polyurethanes                            | Diphenylmethane diisocyanate (MDI) and poly(lactide-co-caprolactone)                                          | Two-Step polymerization process                    | Poly(lactide-co-caprolactone) segment improve the thermal stability and mechanical properties.                                     | Display shape memory and biocompatibility. Promising applications if biomedical field.                                          | 87                                                                                          |    |
|                                          | Succinic acid (SU), sebacic acid (SA), fumaric acid (FA), 1,3-propanediol (PDO), 1,4-butanediol (BDO) and MDI | Melt polycondensation                              | Elongation at break > 800% and 30MPa of tensile strength with a                                                                    | Environmentally friendly and biodegradable TPUs                                                                                 | 89                                                                                          |    |

|            |                                                                                                                                                                         |                                      |                                                                                                     |                                                                                                                 |                     |
|------------|-------------------------------------------------------------------------------------------------------------------------------------------------------------------------|--------------------------------------|-----------------------------------------------------------------------------------------------------|-----------------------------------------------------------------------------------------------------------------|---------------------|
|            |                                                                                                                                                                         |                                      | macrodiol composition of 60%.                                                                       |                                                                                                                 |                     |
|            | Poly(1,3-propylene succinate) glycol (PPS), MDI and BDO                                                                                                                 | One-pot solvent-free polymerization  | The use of PPS with high molecular weight in the TPU exhibit better mechanical properties.          | Fully biobased TPU with thermo-induced shape memory.                                                            | <sup>90</sup>       |
|            | Tall oil (TO)based polyol, soybean oil (SO)-based polyol, rapeseed oil (RO)-based polyol, poly(ethylene adipate (PEA), MDI, ethylenglycol (EG) and dicyandiamide (DYDI) | One-step method                      | Macrodiols based on tall and rapeseed oil lead to materials with better fire resistance properties. | PU with TO polyols have lower emission of carbon monoxide than the reference material.                          | <sup>91</sup>       |
|            | Polytetramethylene ether glycol (PTMEG), MDI, BDO and isosorbide.                                                                                                       | Pre-polymer method                   | The isosorbide content affects thermal and mechanical properties.                                   | Use of isosorbide as biobased chain extender.                                                                   | <sup>92, 93</sup>   |
|            | Polycarbonate diol (PCD), isosorbide and hexamethylene diisocyanate (HDI).                                                                                              | One-step condensation polymerization | $T_g$ of the TPU depend on the isosorbide/PCD ratio.                                                | TPU display biocompatibility and flexibility.                                                                   | <sup>94</sup>       |
|            | Isosorbide, MDI and rapeseed oil-issued polyester polyol                                                                                                                | Two-step synthesis                   | The presence of isosorbide results in a slight increase of hardness and shape retention             | Do not increase the water absorption by the presence of isosorbide significantly                                | <sup>95</sup>       |
|            | Azealic acid, isosorbide, MDI and BPO                                                                                                                                   |                                      | The polyester polyol was synthesized by esterification of azelaic acid and isosorbide               | Properties are dependent on the content of diisocyanate                                                         | <sup>96</sup>       |
|            | Poly(tetra-methylene ether glycol), MDI and Isosorbide or isomannide                                                                                                    | Pre-polymer method                   | Display reversible properties that allow reprocessability at mild temperatures                      | The presence of isosorbide or isomannide as chain extender improve the self-healing features.                   | <sup>97</sup>       |
|            | Poly(propylene succinate)s, MDI, BPO and 1,3-propanediol (PDO)                                                                                                          | Pre-polymer method                   | Elongation at break up to 550% and tensile strength of 30 MPa                                       | Biobased thermoplastic polyurethane elastomers with low stiffness and good damping capacity                     | <sup>98</sup>       |
|            | Biobased diisocyanate (bio-DIC), BPO, HDI and $\alpha$ , $\beta$ -oligo(ethylene-butylene adipate) diol                                                                 | Pre-polymer method                   | Tensile strength from 6.5 to 33.3 MPa with a content of 50% of bio-DIC                              | Content of the bio-DIC affects thermal and thermomechanical properties.                                         | <sup>99</sup>       |
| Polyesters | Poly(L-lactide- <i>b</i> - $\epsilon$ -decalactone- <i>b</i> -L-lactide)                                                                                                | ROP                                  | $M_n > 30 \text{ kDa}$<br>$\text{Đ} \leq 1.5$                                                       | Copolymers with a $T_g$ of -50°C to compositions of mol% of 40/60 and 80/20 of LLA/ $\epsilon$ DL, respectively | <sup>107, 108</sup> |

|                                                                                                                                                         |                                               |                                                                                                                                   |                                                                                          |     |
|---------------------------------------------------------------------------------------------------------------------------------------------------------|-----------------------------------------------|-----------------------------------------------------------------------------------------------------------------------------------|------------------------------------------------------------------------------------------|-----|
| Poly(L-lactide- <i>b</i> - $\delta$ -decalactone- <i>b</i> -L-lactone)                                                                                  | ROTEP                                         | Display elastomeric behavior with wax appearance.                                                                                 | Develop of new sustainable copolymers.                                                   | 110 |
| Poly(lactide- <i>co</i> -polymenthide- <i>co</i> -poly(lactide)                                                                                         | ROTEP                                         | Elastomeric behavior, Young's module of 26.8 $\pm$ 2.1 MPa and strain at break of 765 $\pm$ 40%                                   | Develop to replace the commercial styrenic block polymers                                | 109 |
| Poly(ethylenglicol- <i>b</i> - $\epsilon$ -decalactone) and poly( $\epsilon$ -decalactone- <i>b</i> -ethylenglicol- <i>b</i> - $\epsilon$ -decalactone) | ROP                                           | Amphiphilic block copolymers with self-assemble into micelles. Elastomeric properties not mentioned.                              | Potential biomedical applications due its low cytotoxicity and biodegradability          | 111 |
| Poly(lactide)- <i>b</i> -poly(caprolactone- <i>co</i> - $\epsilon$ -decalactone)- <i>b</i> -poly(lactide)                                               | ROTEP                                         | Good control over composition and narrow relation between composition and mechanical behavior.                                    | Attractive TPE due its tunable mechanical properties.                                    | 112 |
| Poly( $\gamma$ -methyl- $\epsilon$ -caprolactone)                                                                                                       | ROP                                           | Cross-linked with $\beta$ -lactone (4,4-(ethane-1,2-diyl)bis(oxetan-2-one)                                                        | Promising removable and biodegradable elastomers.                                        | 113 |
| Poly(lactide)- <i>b</i> -poly( $\gamma$ -methyl- $\epsilon$ -caprolactone)- <i>b</i> -poly(lactide)                                                     | ROTEP                                         | The use of isotactic PLA that is semicrystalline there a increase in strength and toughness                                       | ABA block polymers as replace conventional TPEs                                          | 114 |
| Poly( $\beta$ -myrcene)-graft-poly(L-lactide)                                                                                                           | ROP                                           | Copolymers with high molecular weights and narrow distributions.                                                                  | Fully biobased TPE with tunable mechanical properties according to the PLLA/PMy content. | 118 |
| Poly(limonene carbonate)- <i>b</i> -poly( $\epsilon$ -caprolactone)- <i>b</i> -poly(limonene carbonate)                                                 | ROP and LO/ CO <sub>2</sub> ROCOP             | Hard compositions from 21-63 wt% of poly(limonene carbonate). Tensile strength of 21.2 MPa and elongation at break around of 400% | Fully biobased ABA triblock polymer and able to be chemically recycled.                  | 115 |
| Poly(hexamethylene 2,5-furanodicarboxylate)- <i>b</i> -poly(tetrahydrofuran)                                                                            | Transesterification and melt polycondensation | Present shape-memory polymer behavior induced by temperature.                                                                     | The predominance of poly(tetrahydrofuran) segments improves the recovery properties.     | 116 |
| Poly(1,4-butylene 2,5-furandicarboxylate)-PBSS                                                                                                          | Transesterification and melt polycondensation | PBBS soft segment could tuning the                                                                                                | Potential biomedical applications due the copolymers are nontoxic, thermally             | 117 |

|  |  |  |                           |                         |  |
|--|--|--|---------------------------|-------------------------|--|
|  |  |  | mechanical<br>properties. | stable and<br>renewable |  |
|--|--|--|---------------------------|-------------------------|--|
